# Supplementary material for: WITHDRAWN: Effect of 1-alkyl-3-methylimidazolium bromide on thermodynamic and transport properties of azeotropic mixtures of water + ethanol at 298.15 K
Source: Research Square preprint supplement (doi:10.21203/rs.3.rs-6803112/v1), 2025-06-11
Supplement: Supplementary file 1 [file dd5e423227571bf2b2a5ab2b.docx]

**Supporting Information**

**Effect of 1-alkyl-3-methylimidazolium bromide on thermodynamic and transport properties of azeotropic mixtures of water + ethanol at 298.15 K**

**Forouh Malekia, Hemayat Shekaaria*, Shima Ghasemzadeha ,** **Mohammed Taghi Zafarani-Moattara, Behrang Golmohammadi**

a*Department of Physical Chemistry, Faculty of Chemistry, University of Tabriz, Tabriz, Iran, 5166616471*

*Corresponding author: Tel: +98 4133393094. Fax: 98 4133340191. E-mail addresses: [hemayatt@yahoo.com](mailto:hemayatt@yahoo.com)


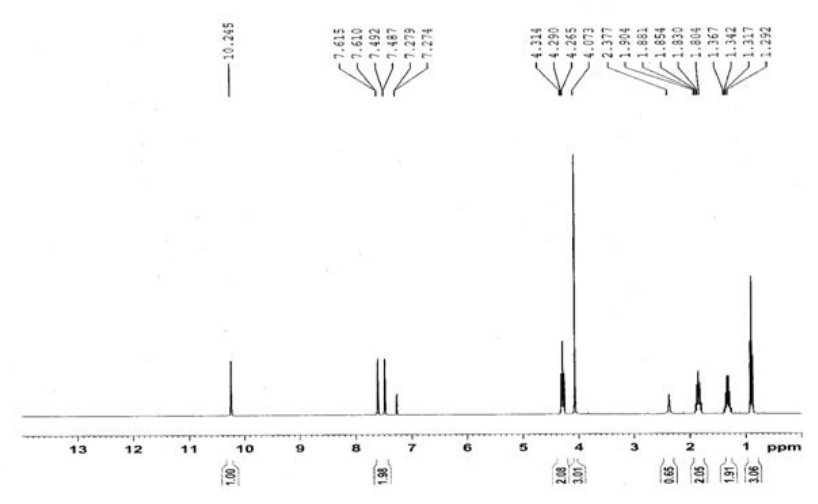


Figure S1: 1HNMR spectrum of studied 1-butyl-3-methylimidazolium bromide [BMIm][Br].


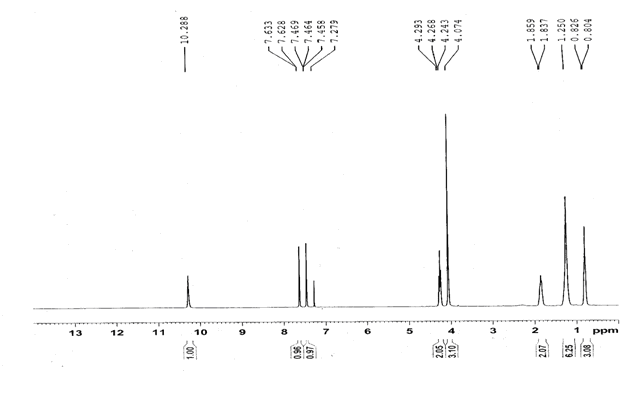


Figure S2: 1HNMR spectrum of studied 1-hexyl-3-methylimidazolium bromide [HMIm][Br].


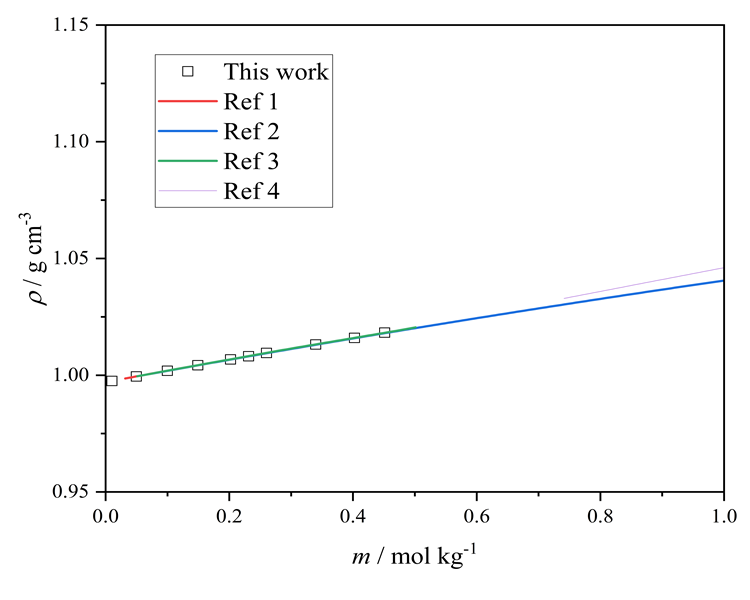


a


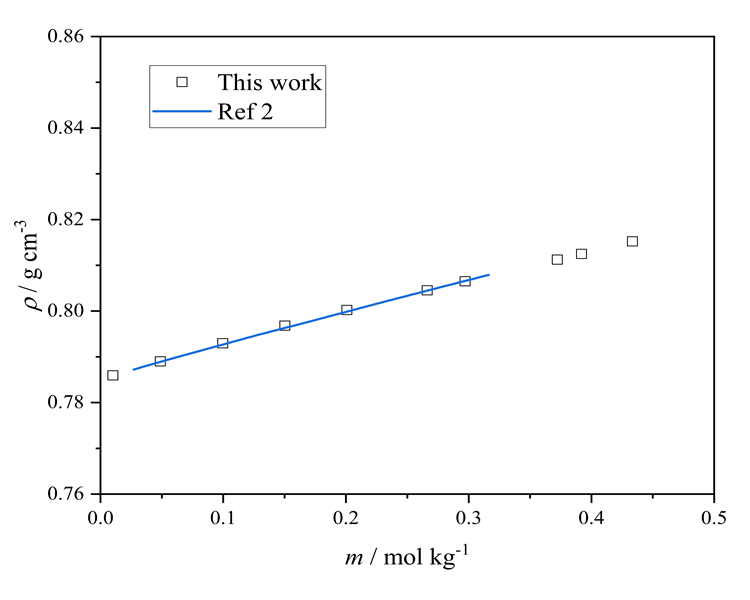


b

Figure S3. The density of a) aqueous [BMIM][Br] compared to the literature data reported Ref 11, Ref 2 2, Ref 33, and Ref 44. b) [BMIM][Br] in ethanol compared to the Ref 2.


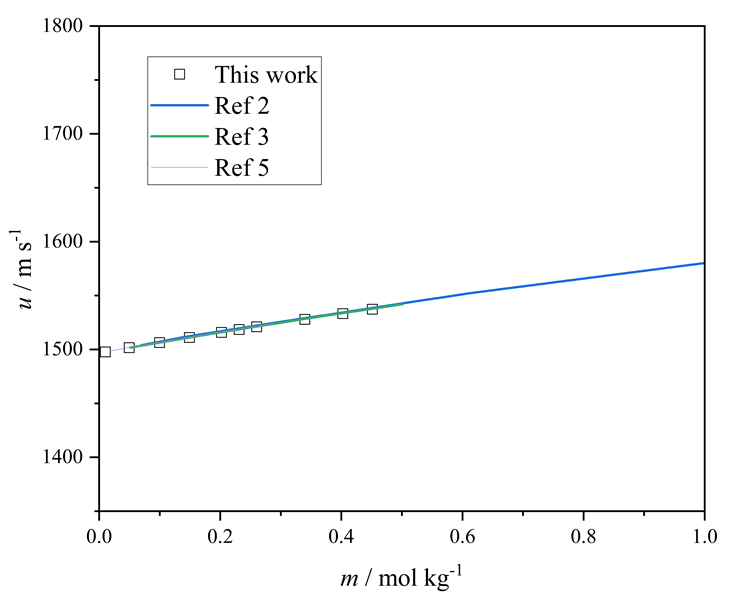


Figure S4. The speed of sound of aqueous [BMIM][Br] compared to the literature data reported Ref 2 2, Ref 33, and Ref 55.


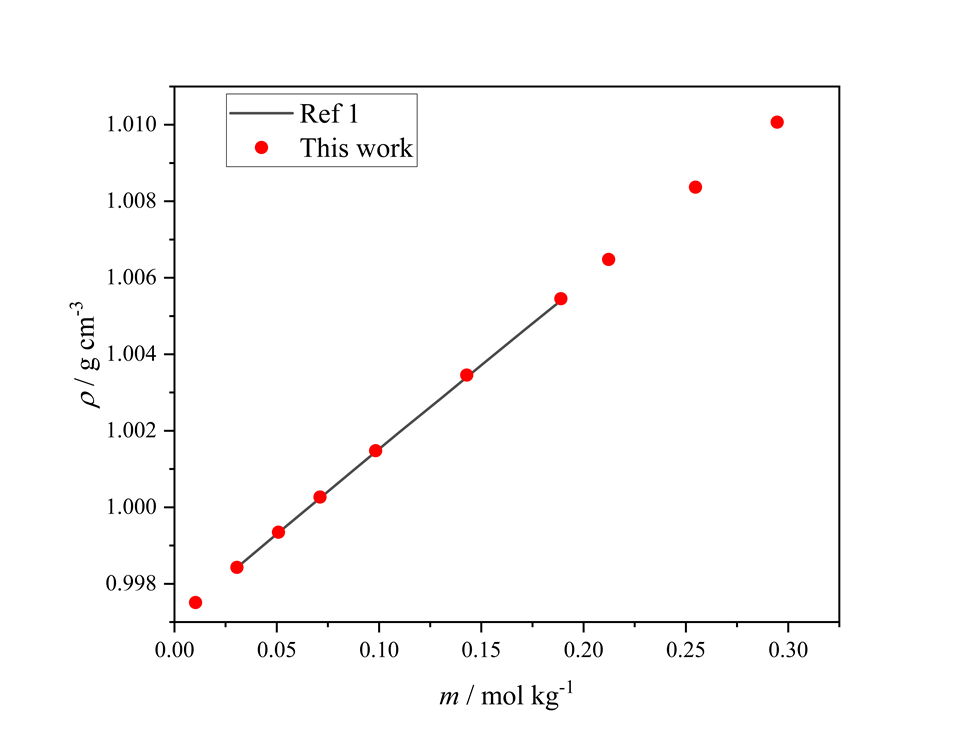


Figure S5. The density of aqueous [HMIM][Br] compared to the literature data reported Ref 1.

REFERENCES

1. Shekaari, H., Zafarani-Moattar, M. T., Kazempour, A. & Ghasedi-Khajeh, Z. Volumetric Properties of Aqueous Ionic-Liquid Solutions at Different Temperatures. *J. Chem. Eng. Data* **60**, 1750–1755 (2015).

2. Zafarani-Moattar, M. T. & Shekaari, H. Apparent molar volume and isentropic compressibility of ionic liquid 1-butyl-3-methylimidazolium bromide in water, methanol, and ethanol at *T*  =   (298.15 to 318.15)   K. *The Journal of Chemical Thermodynamics* **37**, 1029–1035 (2005).

3. Lal, B., Sahin, M. & Ayranci, E. Volumetric studies to examine the interactions of imidazolium based ionic liquids with water by means of density and speed of sound measurements. *The Journal of Chemical Thermodynamics* **54**, 142–147 (2012).

4. Liu, W., Cheng, L., Zhang, Y., Wang, H. & Yu, M. The physical properties of aqueous solution of room-temperature ionic liquids based on imidazolium: Database and evaluation. *Journal of Molecular Liquids* **140**, 68–72 (2008).

5. Sadeghi, R., Golabiazar, R. & Shekaari, H. The salting-out effect and phase separation in aqueous solutions of tri-sodium citrate and 1-butyl-3-methylimidazolium bromide. *The Journal of Chemical Thermodynamics* **42**, 441–453 (2010).
